# Supplementary material
Source: PubMed Central journal article supplement (PMC9012265)
Supplement: NIHMS1793601-supplement-Supplemental_Information.pdf [file NIHMS1793601-supplement-Supplemental_Information.pdf]

**Supplementary Table 1 References for FDA-approved medications supported by GWAS variants**

| <b>Disease</b>       | <b>Lead GWAS SNP</b> | <b>Genetic locus</b>       | <b>FDA-approved medication<br/>Drug class</b>       | <b>PubMed ID</b>               |
|----------------------|----------------------|----------------------------|-----------------------------------------------------|--------------------------------|
| Psoriasis            | rs9988642            | <i>IL12R-<br/>IL23R</i>    | Ustekinumab<br>Biologic                             | PMID: <a href="#">23143594</a> |
| Hyperlipidemia       | rs12916              | <i>HMGCR</i>               | Many<br>Statin                                      | PMID: <a href="#">20686565</a> |
| Hyperlipidemia       | rs2479409            | <i>PCSK9</i>               | Alirocumab<br>Biologic                              | PMID: <a href="#">20686565</a> |
| Type 2 diabetes      | rs1801282            | <i>PPARG</i>               | Many<br>Thiazolidinediones                          | PMID: <a href="#">17463248</a> |
| Type 2 diabetes      | rs5219               | <i>KCNJ11</i>              | Many<br>Sulfonylurea                                | PMID: <a href="#">17463248</a> |
| Osteoporosis         | rs9533090            | <i>TNFSF11<br/>(RANKL)</i> | Denosumab<br>Biologic                               | PMID: <a href="#">22504420</a> |
| Osteoporosis         | rs7751941            | <i>ESR1</i>                | Many<br>Selective estrogen<br>receptor<br>modulator | PMID: <a href="#">22504420</a> |
| Schizophrenia        | rs2514218            | <i>DRD2</i>                | Many<br>Antipsychotic                               | PMID: <a href="#">25056061</a> |
| Rheumatoid arthritis | rs2228145            | <i>IL6R</i>                | Tocilizumab<br>Biologic                             | PMID: <a href="#">24390342</a> |
| Rheumatoid arthritis | rs3087243            | <i>CTLA4</i>               | Abatacept<br>Biologic                               | PMID: <a href="#">24390342</a> |
